# Supplementary material for: Microparticles Immobilized Tamarindus Indica Extract Bioremediates Toxic Chromium in Tannery Effluent and Contaminated Soil
Source: Research Square preprint supplement (doi:10.21203/rs.3.rs-142360/v1), 2021-01-25
Supplement: Supplementary file 1 [file dc41847c2db4ad721d9edad6.docx]

Microparticles Immobilized *Tamarindus indica* Extract Bioremediates Toxic Chromium in Tannery Effluent and Contaminated Soil

Babangida Sanusi Katsayal1; Aliyu Muhammad1; Ambi Ahmed1, 2 and Abdullahi Balarabe Sallau1

List of Plates


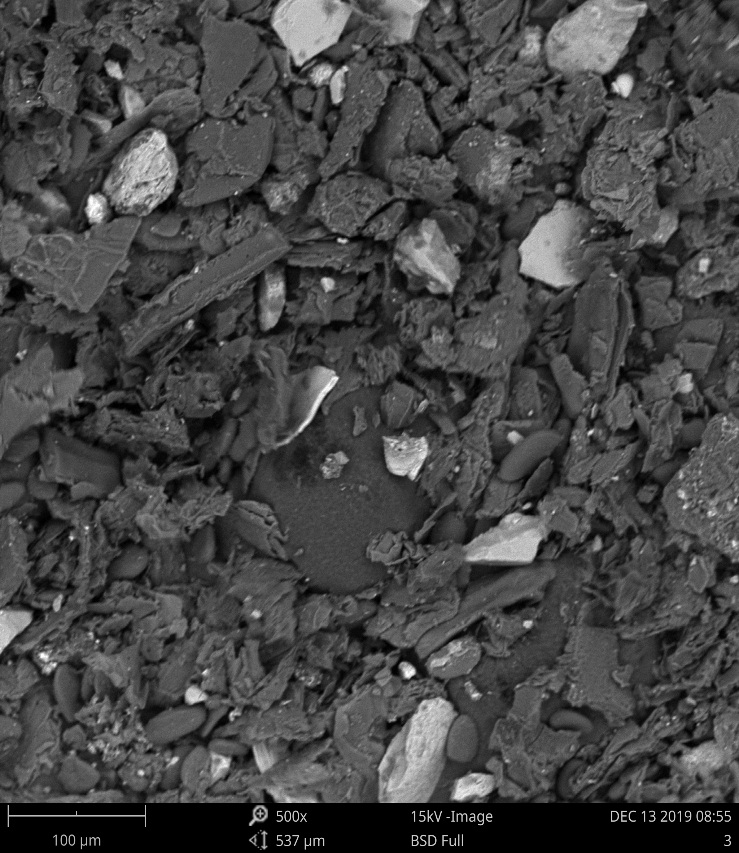


Plate 1:Morphological Appearance of Tamarindus indica Methanolic Leaves Extract-loaded Microparticles. (Magnification x500).
